# Supplementary material for: A Novel Predicted Calcium-Regulated Kinase Family Implicated in Neurological Disorders
Source: PubMed Central journal article supplement (PMC3696010; doi:10.1371/journal.pone.0066427), 2013-06-28
Supplement: pone.0066427.s001.pdf [file pone.0066427.s001.pdf]

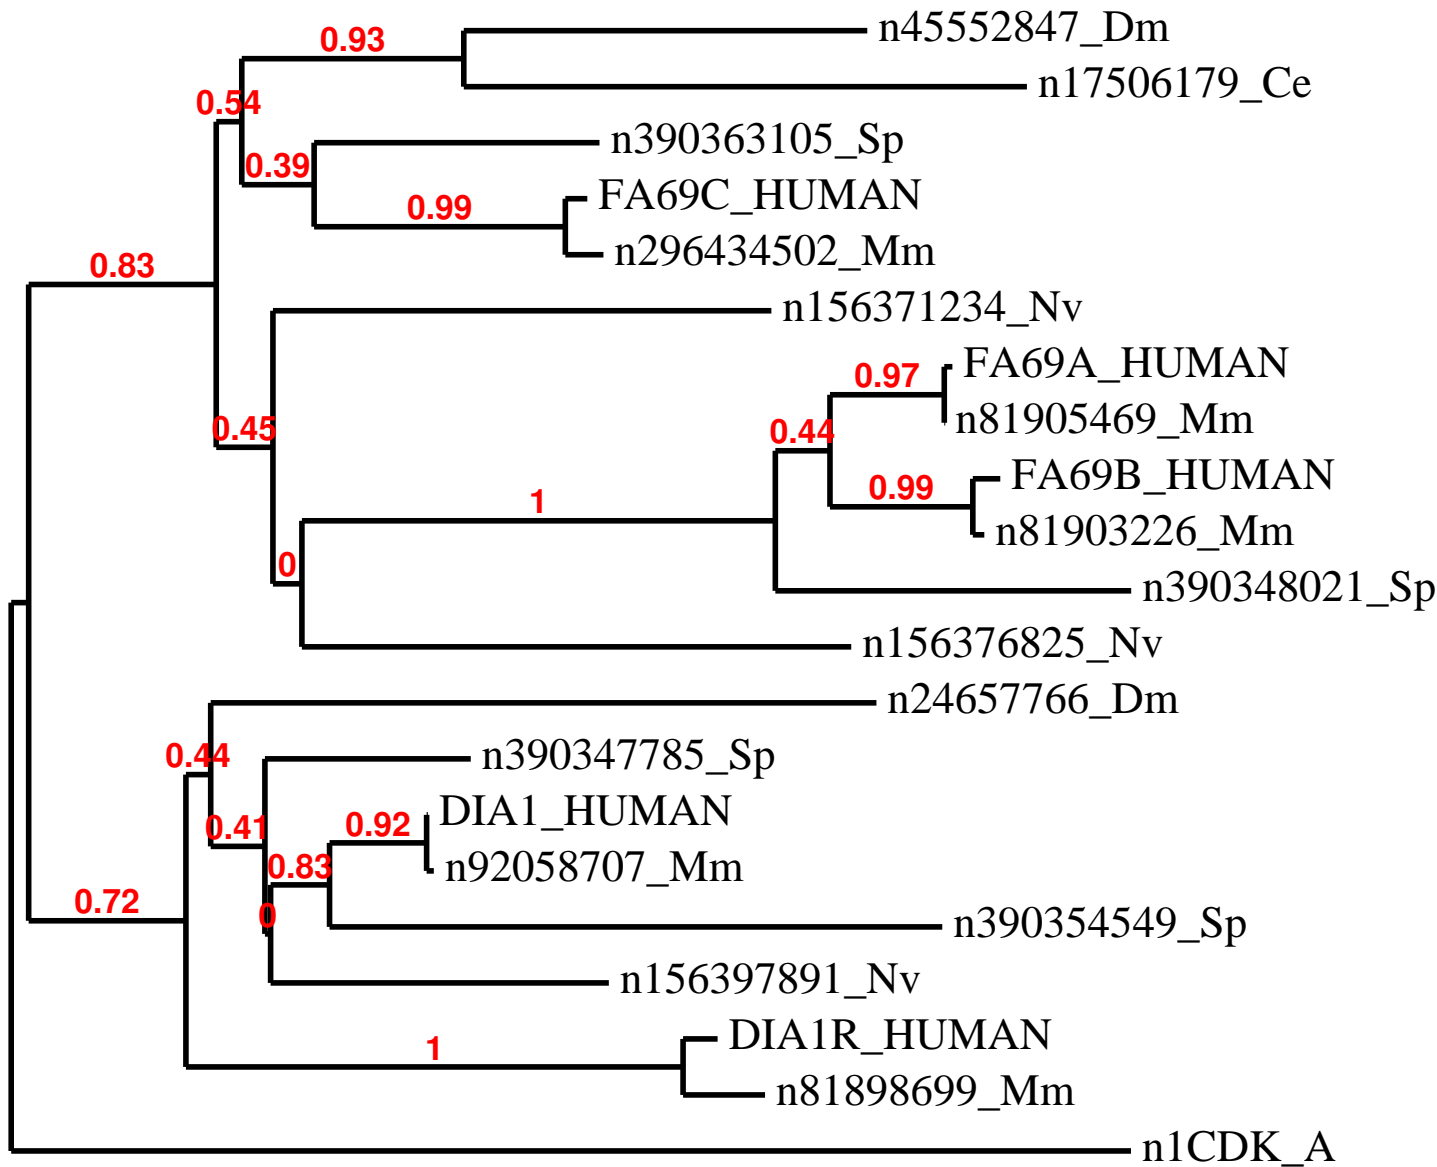

1.
