# Supplementary material for: A Novel Predicted Calcium-Regulated Kinase Family Implicated in Neurological Disorders
Source: PubMed Central journal article supplement (PMC3696010; doi:10.1371/journal.pone.0066427), 2013-06-28
Supplement: pone.0066427.s003.pdf [file pone.0066427.s003.pdf]

## PolyPhobius prediction

---

### Prediction of gi|165932391|ref|NP\_001006606.2|

```

ID   gi|165932391|ref|NP_001006606.2|
FT   TOPO_DOM    1     27     CYTOPLASMIC.
FT   TRANSMEM    28    47     CYTOPLASMIC.
FT   TOPO_DOM    48    428    NON CYTOPLASMIC.
//

```

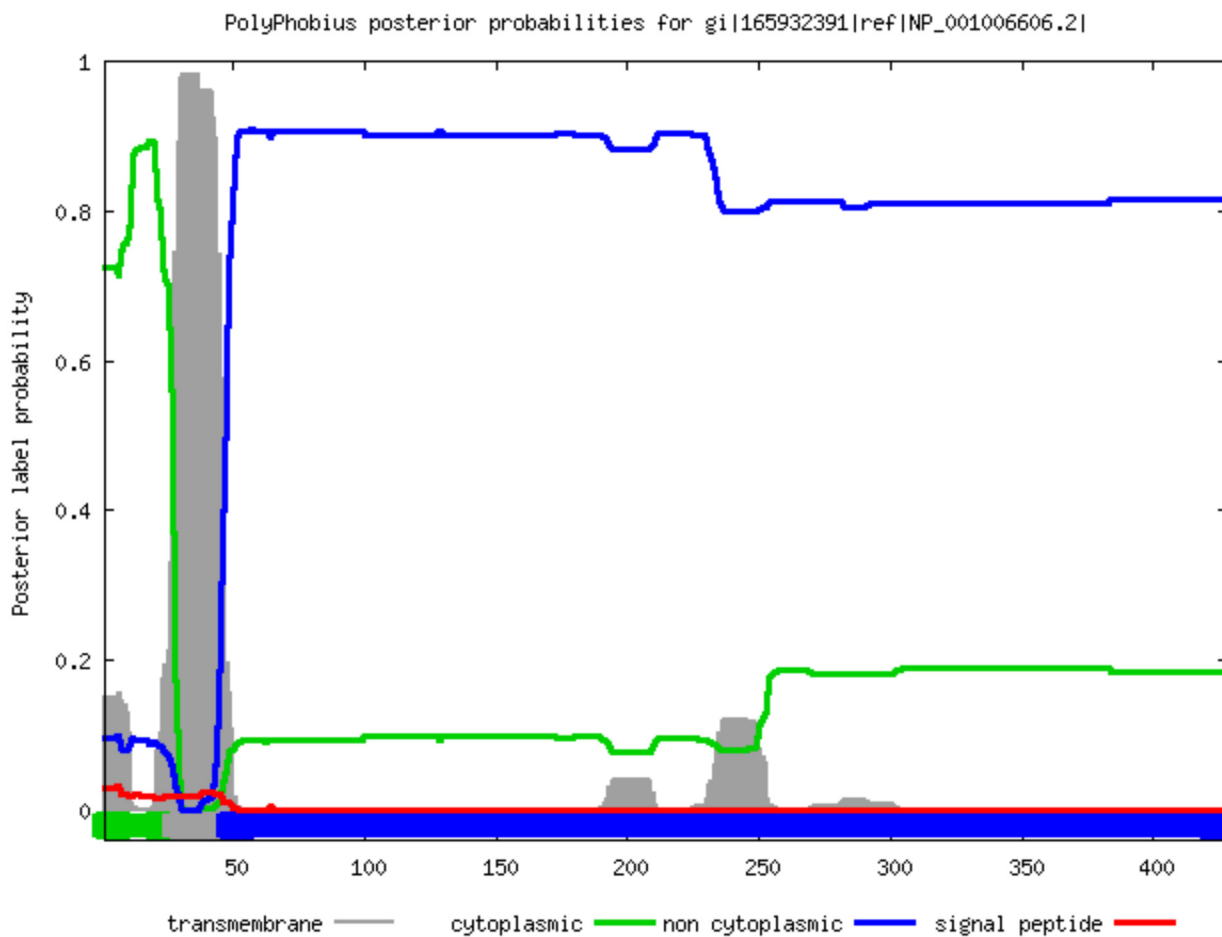

The prediction is based on an [alignment](#). The probability data used in the plot is found [here](#), and the gnuplot script is [here](#).

---

### Prediction of gi|27734895|ref|NP\_775823.1|

```

ID   gi|27734895|ref|NP_775823.1|
FT   SIGNAL      1     37
FT   REGION      1     17     N-REGION.
FT   REGION      18    29     H-REGION.
FT   REGION      30    37     C-REGION.
FT   TOPO_DOM    38    430    NON CYTOPLASMIC.
//

```

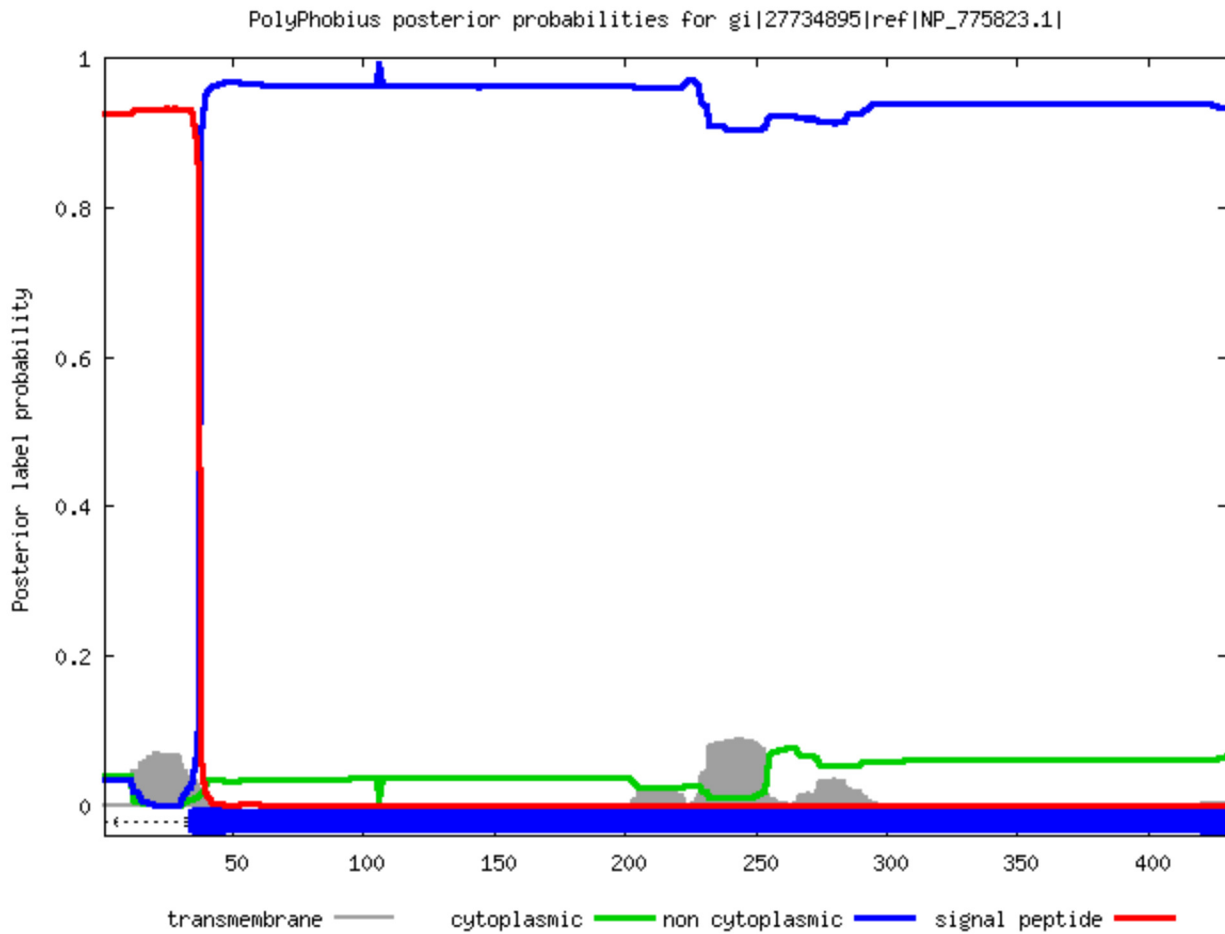

The prediction is based on an [alignment](#). The probability data used in the plot is found [here](#), and the gnuplot script is [here](#).

### Prediction of gi|193804854|ref|NP\_789789.2|

```
ID gi|193804854|ref|NP_789789.2|
FT SIGNAL 1 34
FT REGION 1 14 N-REGION.
FT REGION 15 28 H-REGION.
FT REGION 29 34 C-REGION.
FT TOPO_DOM 35 433 NON CYTOPLASMIC.
//
```

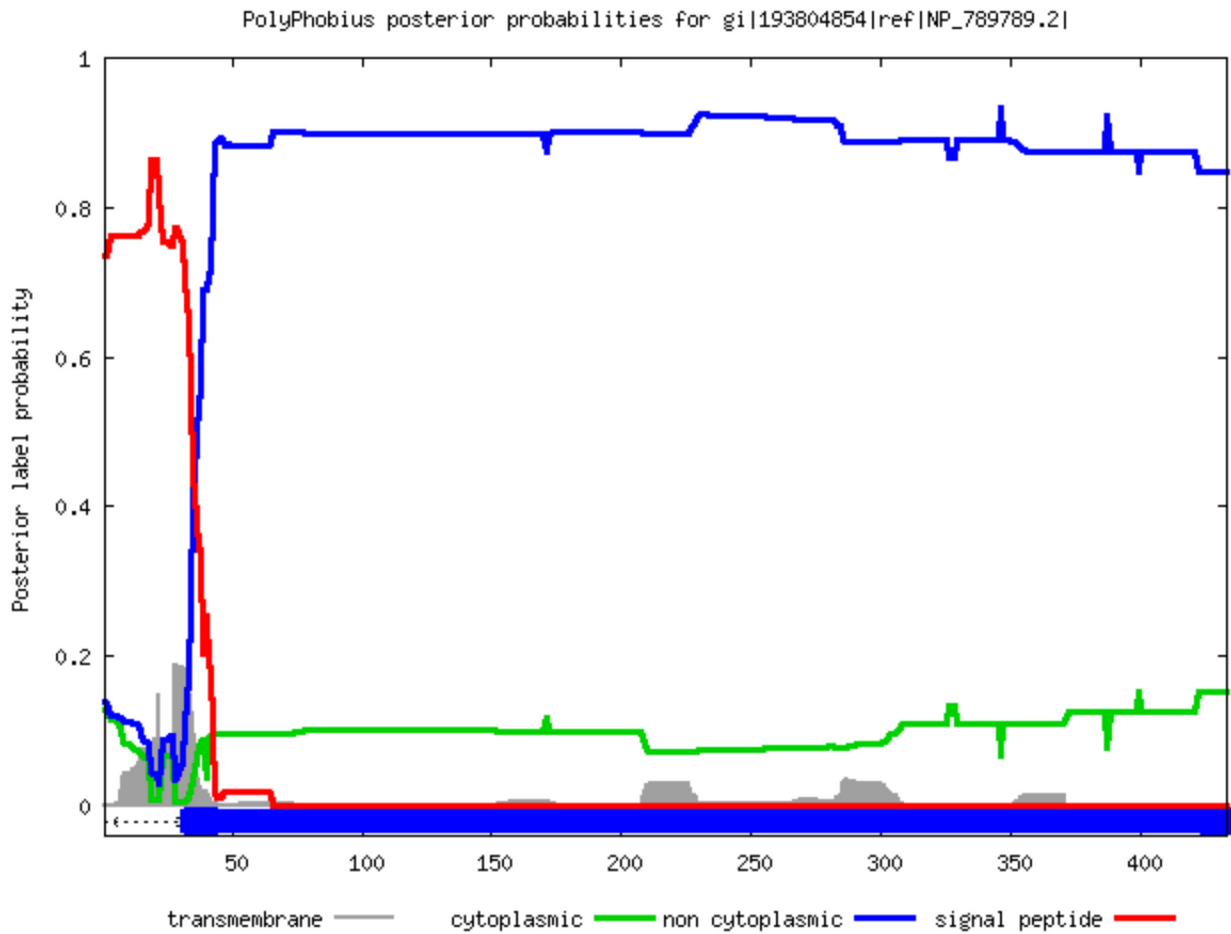

The prediction is based on an [alignment](#). The probability data used in the plot is found [here](#), and the gnuplot script is [here](#).

### Prediction of gi|224922839|ref|NP\_689634.2|

```

ID    gi|224922839|ref|NP_689634.2|
FT    TOPO_DOM      1      30      CYTOPLASMIC.
FT    TRANSMEM     31      50
FT    TOPO_DOM     51     431      NON CYTOPLASMIC.
//

```

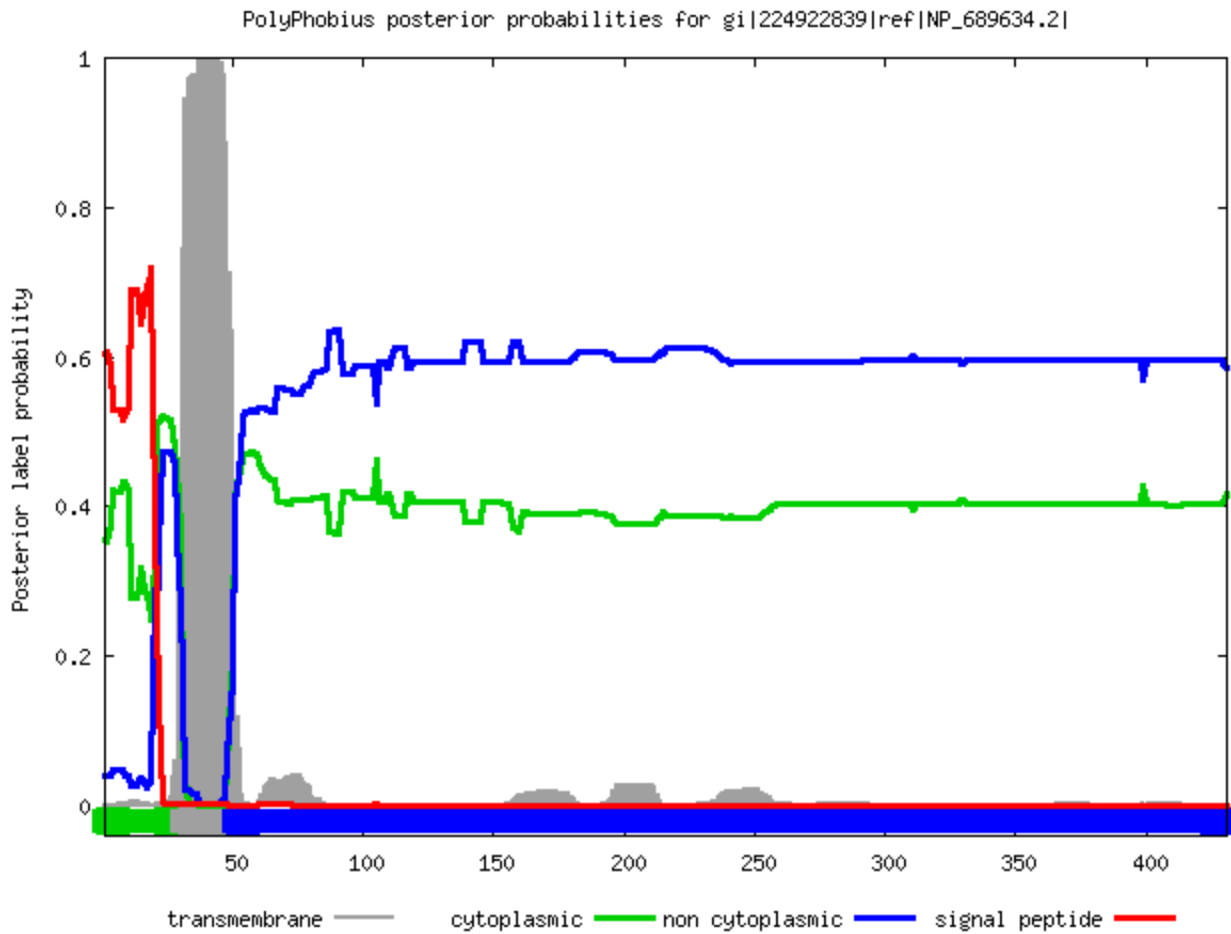

The prediction is based on an [alignment](#). The probability data used in the plot is found [here](#), and the gnuplot script is [here](#).

### Prediction of gi|195546915|ref|NP\_001037834.2|

```
ID gi|195546915|ref|NP_001037834.2|
FT TOPO_DOM 1 23 CYTOPLASMIC.
FT TRANSMEM 24 44
FT TOPO_DOM 45 419 NON CYTOPLASMIC.
//
```

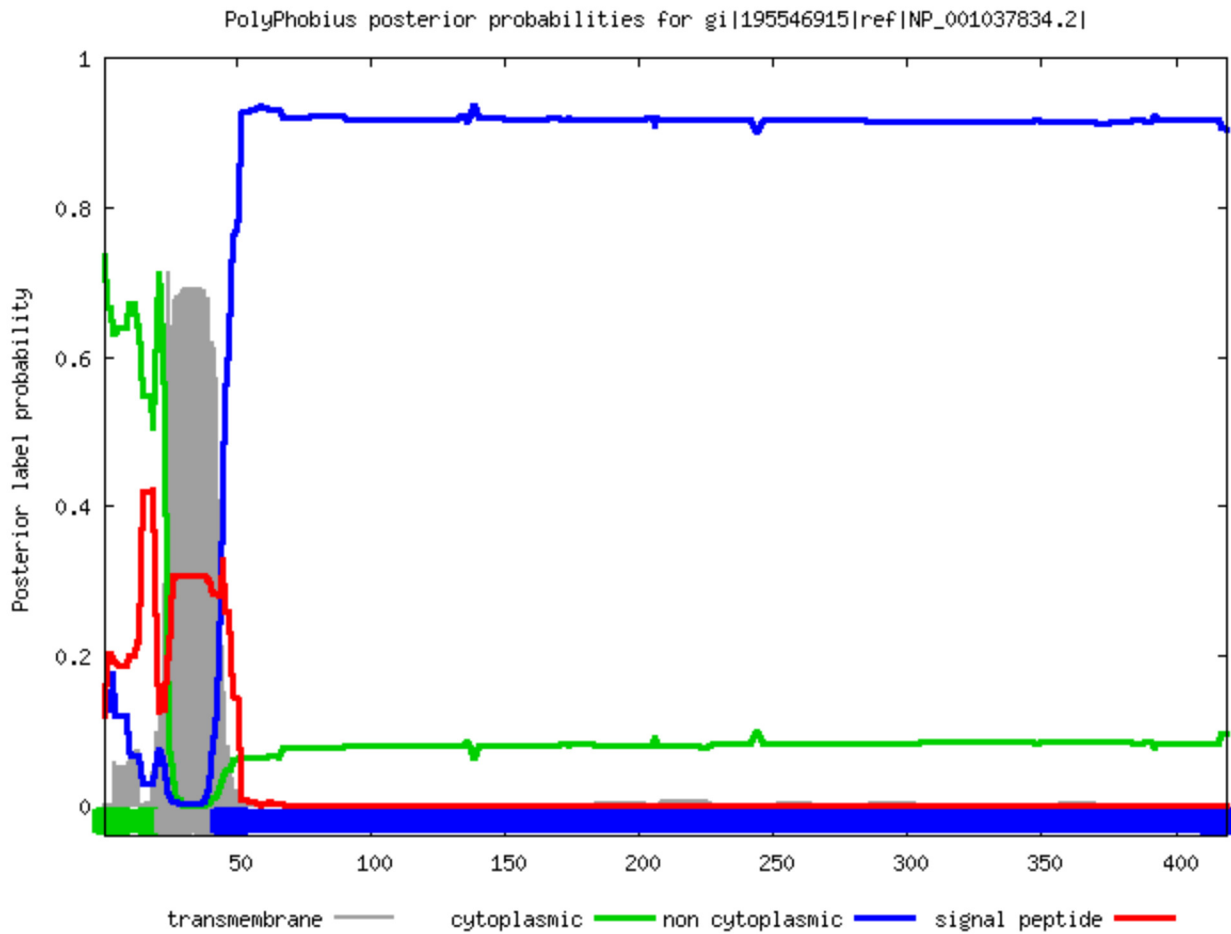

The prediction is based on an [alignment](#). The probability data used in the plot is found [here](#), and the gnuplot script is [here](#).
